# Supplementary material for: The Renin–Angiotensin System (RAS) in COVID-19 Disease: Where We Are 3 Years after the Beginning of the Pandemic
Source: Microorganisms. 2024 Mar 14;12(3):583. doi: 10.3390/microorganisms12030583 (PMC10975343; doi:10.3390/microorganisms12030583)
Supplement: Supplementary file 1 [file microorganisms-12-00583-s001.zip › Supplementary Data Set.xlsx]

## Sheet: DATABASE
ACE_ID	serumid	gender	admission	dob	age	ACE Inhibitor	who_state	who_score	mod_pt_score_2	clinicalcourse	outcome	outcomeb	daysymptomsblood_OLD	timing_sympt	symptomsdate	pcr_ct	IgM	IgG	IgM_positivity	IgG_positivity	fever	cough	diarrhea	dyspnoea	dayssymptomsdiagnosis	oxygen_supply	oxygen_cat	resprate	systolicbp	dyastolicbp	heartrate	reasonforadmission	comorbidity	comorbidity-category	treatment_received	tt_category	modulatory_tt	type_tt_prior_blood	tt_prior_blood	tt_prior_blood_duration	ace	pco2	po2	so2	po2fio2	po2fio2_cat	creatinine	creatininemgdl	ddimer
48	7967	0	2020-06-26	1968-01-20	52	.	.	.	.	.	.	.	.	.	.	.	.	.	.	.	.	.	.	.	.	.	.	.	.	.	.	.	.	.	.	.	.	.	.	.	.	.	.	.	.	.	.	.	.
58	8035	0	2020-07-01	1968-07-01	52	.	.	.	.	.	.	.	.	.	.	.	.	.	.	.	.	.	.	.	.	.	.	.	.	.	.	.	.	.	.	.	.	.	.	.	.	.	.	.	.	.	.	.	.
59	8039	1	2020-07-03	1968-09-03	51	.	.	.	.	.	.	.	.	.	.	.	.	.	.	.	.	.	.	.	.	.	.	.	.	.	.	.	.	.	.	.	.	.	.	.	.	.	.	.	.	.	.	.	.
57	8040	0	2020-07-03	1965-03-03	55	.	.	.	.	.	.	.	.	.	.	.	.	.	.	.	.	.	.	.	.	.	.	.	.	.	.	.	.	.	.	.	.	.	.	.	.	.	.	.	.	.	.	.	.
49	8044	0	2020-07-03	1967-06-13	53	.	.	.	.	.	.	.	.	.	.	.	.	.	.	.	.	.	.	.	.	.	.	.	.	.	.	.	.	.	.	.	.	.	.	.	.	.	.	.	.	.	.	.	.
50	8045	1	2020-07-03	1958-06-15	62	.	.	.	.	.	.	.	.	.	.	.	.	.	.	.	.	.	.	.	.	.	.	.	.	.	.	.	.	.	.	.	.	.	.	.	.	.	.	.	.	.	.	.	.
56	8046	1	2020-07-03	1967-08-24	52	.	.	.	.	.	.	.	.	.	.	.	.	.	.	.	.	.	.	.	.	.	.	.	.	.	.	.	.	.	.	.	.	.	.	.	.	.	.	.	.	.	.	.	.
55	8047	1	2020-07-03	1965-10-21	54	.	.	.	.	.	.	.	.	.	.	.	.	.	.	.	.	.	.	.	.	.	.	.	.	.	.	.	.	.	.	.	.	.	.	.	.	.	.	.	.	.	.	.	.
53	8051	0	2020-07-03	1978-11-25	41	.	.	.	.	.	.	.	.	.	.	.	.	.	.	.	.	.	.	.	.	.	.	.	.	.	.	.	.	.	.	.	.	.	.	.	.	.	.	.	.	.	.	.	.
52	8216	0	2020-07-13	1965-05-24	55	.	.	.	.	.	.	.	.	.	.	.	.	.	.	.	.	.	.	.	.	.	.	.	.	.	.	.	.	.	.	.	.	.	.	.	.	.	.	.	.	.	.	.	.
54	8219	1	2020-07-13	1962-06-24	58	.	.	.	.	.	.	.	.	.	.	.	.	.	.	.	.	.	.	.	.	.	.	.	.	.	.	.	.	.	.	.	.	.	.	.	.	.	.	.	.	.	.	.	.
51	8220	1	2020-07-13	1962-02-25	58	.	.	.	.	.	.	.	.	.	.	.	.	.	.	.	.	.	.	.	.	.	.	.	.	.	.	.	.	.	.	.	.	.	.	.	.	.	.	.	.	.	.	.	.
3	2407	0	2020-04-02	1935-05-23	84	ACE-inhib	moderate	5	6	worsened	DIED	died	17	17	2020-03-16	19	1.95	6.34	1	1	0	0	0	1	15	mask	1	tachypnea	150	90	76	fever, cough	ischemic cardiomyopathy	Cardiovascular	antiviral+hydroxy+corticosteroids	2	1	antiviral+hydroxy	1	1	17.58	34	76	97.2	108	2	82	0.93	5400
42	3439	1	2020-04-14	1940-09-14	79	NO	moderate	4	5	improved	DIM	discharged	2	2	2020-04-09	32	8.91	8.15	1	1	0	0	0	0	.	none	0	ok	120	60	63	transferred for positive covid swab	ictus	Cardiovascular	hydroxy	6	0	hydroxy	1	3	40.03	32	60	94.2	286	1	75	0.85	495
41	3432	1	2020-04-14	1941-06-13	78	NO	moderate	5	5	worsened	DIED	died	4	4	2020-04-10	19	0.02	0.01	0	0	1	0	0	0	2	nasal prongs	1	mild tachypnea	130	70	80	fever, dyspnea	ictus, aneurysm, hypertension	Cardiovascular	none	0	0	none	0	.	27.99	37	91	98.9	243	1	63	0.71	726
13	3932	0	2020-04-20	1937-07-02	82	ARBs	moderate	4	4	improved	DIM	discharged	9	9	2020-04-11	.	.	.	.	.	0	0	0	0	.	none	0	ok	.	.	66	fever	hypertension	Cardiovascular	none	0	0	none	0	.	16.43	32	71	97.3	338	0	135	1.53	559
6	2698	1	2020-04-06	1940-02-07	80	ACE-inhib	moderate	4	5	improved	DIM	discharged	2	2	2020-04-04	22	37.43	2.43	1	1	1	1	0	0	.	none	0	ok	155	80	86	transferred for fever and dyspnea	hypertension	Cardiovascular	none	0	0	none	0	.	2.46	38	53	91.5	252	1	66	0.73	2991
25	2072	0	2020-03-27	1956-10-13	63	NO	moderate	5	5	improved	DIM	discharged	14	14	2020-03-13	25	7.04	5.86	1	1	1	0	0	0	11	mask	1	mild tachypnea	140	75	80	fever	hypertension	Cardiovascular	hydroxy	6	0	hydroxy	1	2	27.88	39	82	89.5	241	1	113	1.28	376
9	3235	1	2020-04-10	1949-02-17	71	ACE-inhib	moderate	5	5	improved	TRANSFERRED	discharged	26	26	2020-03-15	25	17.99	9.24	1	1	0	0	0	0	22	nasal prongs	1	tachypnea	120	85	73	chest pain	hypertensive cardiomyopathy	Cardiovascular	hydroxy	6	0	hydroxy	1	1	44.94	41	77	98.3	275	1	59	0.67	567
38	3018	1	2020-04-08	1934-07-10	85	NO	moderate	4	4	improved	TRASF RSA	discharged	4	8	2020-03-31	39	0.04	0.03	0	0	0	0	0	0	0	none	0	ok	100	60	72	transferred for fever	hypertensive cardiomyopathy, obesity, vascular encephalopathy	Cardiovascular + diabetes + obesity	none	0	0	none	0	.	20.47	32	72	96.3	300	0	84	0.95	1530
14	2027	0	2020-03-26	1968-09-20	51	ARBs	moderate	5	5	improved	TRASF	discharged	.	.	2020-03-17	.	.	.	.	.	1	1	0	1	.	mask (venturi)	1	tachypnea	125	70	75	fever, cough	diabetes, HTA, obesity	Cardiovascular + diabetes + obesity	steroids, azitromycin, hydroxycloroquine, tocilizumab, antibiotics for VAP, darunavir/cobistat	4	1	steroids and hydroxycloroquine, antibiotics, betablockers, oral antidiabetics and insuline,sartans (losartan)	Signicant: steroids and losartan	Significant steroids and losartan (tocilizumab after blood sample) of unknown duration	.	37	58	94.9	103-136	2	83	0.94	1001
16	2009	0	2020-03-26	1964-12-07	55	NO	severe	6	6	improved	DIM	discharged	.	.	.	.	13.84	1.13	1	0	1	1	0	1	.	iv (intubate)	3	tachypnea	150	75	.	fever, cough and dyspnea	diabetes, HTA, HCV hepatopathy, fibromyalgia, depressive syndrome, obesity	Cardiovascular + diabetes + obesity+other	hydroxycloroquine, darunavir/cobicistat, antibiotics	1	0	antibiotics, oral antidiabetics, opioid analgesics, benzodiazepines, betablocker	realistically no significant treatment	realistically no significant treatment	34.99	39	135	99.9	260		74	0.84	543
47	4038	0	2020-04-21	1936-01-06	84	NO	severe	6	6	worsened	DIED	died	2	.	.	30	2.71	9.09	1	1	0	0	0	1	1	venturi	1	tachypnea	135	75	65	desaturation	diabetes, ictus, STEMI, cancer of colon	Cardiovascular + diabetes + other	none	0	0	none	0	.	16.71	21	42	86.1	75	2	221	2.5	1241
15	2170	0	2020-03-30	1936-03-24	84	NO	.	.	5	worsened	DIED	died	.	.	.	.	0.01	0.01	0	0	1	1	0	1	.	mack	1	tachypnea	75	45	33	fever, cough	diabetes, HTA, COPD, anemia, FA, Lymphatic chronic leukemia, depressive syndrome, heart failure	Cardiovascular + diabetes + other	hydroxycloroquine, darunavir/cobicistat, antibiotics for bacterial neumonia	1	0	proton pump inhibitor, beta blockers, diuretic, selective serotonine reuptake inhibitor, steroids, antibiotics, antipsychotic, inhaled anticholinergic drug , inhaled long-acting beta-agoninists and steroids	Significant: systemic and inhaled steroids	Significant: systemic and inhaled steroids: unknown duration	10.92	59	151	95	151	1	94	1.06	27636
36	2903	0	2020-04-07	1934-06-27	85	NO	moderate	5	6	worsened	DIM	discharged	1	1	2020-04-06	15	0	0	0	0	1	0	0	1	0	mask	1	tachypnea	105	60	93	fever, desaturation	hypertensive cardiomyopathy, diabetes, vascular encephalopathy	Cardiovascular + diabetes	none	0	0	none	0	.	37.57	38	55	90.8	83	2	161	1.82	839
5	2691	1	2020-04-04	1925-06-11	94	ACE-inhib	moderate	5	4	worsened	DIED	died	2	2	2020-04-02	26	0.11	0.06	0	0	1	0	0	0	1	mask	1	mild tachypnea	110	65	85	transferred for fever and desaturation	hypertensive cardiomyopathy, diabetes	Cardiovascular + diabetes	hydroxy	6	0	hydroxy	1	1	6.36	46	67	94.6	310	0	128	1.45	2828
10	3433	1	2020-04-14	1930-04-01	90	ACE-inhib	moderate	4	5	improved	DIM	discharged	7	7	2020-04-07	34	.	.	.	.	0	0	0	0	2	none	0	ok	115	70	50	cough, rectorrhagia	hypertension, diabetes	Cardiovascular + diabetes	hydroxy	6	0	hydroxy	1	4	3.09	31	52	89	252	1	78	0.88	5007
20	2045	0	2020-03-27	1951-06-14	68	NO	moderate	5	5	improved	DIM	discharged	2	2	2020-03-25	24	1.61	6.6	1	1	0	0	0	0	0	mask	1	tachypnea	140	80	93	syncope	hypertension, diabetes	Cardiovascular + diabetes	antiviral+hydroxy	1	0	antiviral+hydroxy	1	1	23.13	39	75	96.5	200	1	68	0.77	552
4	2515	1	2020-04-03	1941-12-06	78	ACE-inhib	moderate	5	4	improved	DIM	discharged	8	7	2020-03-27	19	1.89	3.84	1	1	1	0	0	0	5	mask	1	tachypnea	130	70	80	fever, dyspnoea, cough	diabetes, hypercholesterolemia, hypertensive cardiomyopathy, OSAS	Cardiovascular + diabetes + other	antiviral+hydroxy	1	0	hydroxy	1	1	27.79	31	68	96.9	348	0	50	0.57	449
18	2008	0	2020-03-26	1955-02-14	65	NO	severe	6	6	improved	TRASF	discharged	11	11	2020-03-15	27	5.64	6.59	1	1	1	0	0	1	10	niv	3	tachypnea	140	80	86	fever, diarrhea	ischemic cardiomyopathy, hypertension, kidney cancer	Cardiovascular + other	antiviral+hydroxy	1	0	antiviral+hydroxy	1	1	17.14	28	40	88.7	200	1	108	1.22	2019
8	3019	0	2020-04-08	1937-08-04	82	ACE-inhib	moderate	5	5	worsened	DIM	discharged	2	2	2020-04-06	23	4.61	4.66	1	1	0	0	0	0	1	mask	1	tachypnea	150	90	70	acute respiratory insufficiency	hepatic cirrhosis, hypertension	Cardiovascular + other	none	0	0	none	0	.	7.15	36	47	87.3	223	1	61	0.69	4077
40	3241	0	2020-04-10	1946-12-09	73	NO	moderate	5	4	worsened	DIM	discharged	4	2	2020-04-08	21	0.09	0.17	0	0	0	0	0	0	1	mask	1	mild tachypnea	100	60	70	dyspnea	diabetes, ischemic cardiomyopathy, hypertension	Cardiovascular + other	hydroxy+immunological	8	1	none	0	.		27	65	95.5	310	0	149	1.69	1465
17	3570	1	2020-04-15	1944-05-13	75	NO	.	4	4	improved	dim	discharged	.	.	.	.	10.8	8.05	1	1	0	0	0	0	.	none	0	normal rate	60	110	84	Hospitalized for other reason, positivity to screening for Sars-CoV-2	HA, AF with TIA, hypercholesterolemia, CMV ischemic colitis,right and left knee replacement surgery complicated by emorragic shock and frontal ischemic cerebral lesion	Cardiovascular + other	None for COVID-19	0	0	alendornate, antidepressive, proton pump inhibitor, antiarrhytmic, valganciclovir (antiviral for CMV), statins, mesalazine, benzodiazepin, anticoagulant, antibiotics,diuretics.	no significant treatment	no significant treatment	35.11	30	96	96	457	0	52	0.59	1498
28	2408	1	2020-04-02	1954-09-30	65	NO	moderate	5	5	improved	DIM	discharged	11	11	2020-03-22	30	7.7	7.18	1	1	0	1	0	0	9	mask	1	tachypnea	130	70	86	fever, cough, desaturation	hypertension, hypothyroidism	Cardiovascular + other	antiviral+hydroxy	1	0	antiviral+hydroxy	1	1	31.33	42	55	94.4	171	1	65	0.74	431
1	2071	0	2020-03-27	1944-07-25	75	ACE-inhib	moderate	5	5	improved	DIM	discharged	12	12	2020-03-15	19	34.47	6.74	1	1	0	0	0	0	8	mask	1	tachypnea	130	80	100	fever	hypertension, Parkinson disease	Cardiovascular + other	antiviral+hydroxy	1	0	antiviral+hydroxy	1	4	2.11	34	50	92.9	248	1	74	0.84	3786
33	2699	0	2020-04-06	1951-12-20	68	NO	moderate	4	4	improved	DIM	discharged	3	3	2020-04-03	28	2.59	4.67	1	1	1	0	0	0	0	none	0	tachypnea	105	60	78	fever	IRC, ischemic cardiomyopathy , hypertension	Cardiovascular + other	hydroxy	6	0	hydroxy	1	2	19.7	29	70	99	357	0	241	2.73	1950
26	2346	1	2020-04-01	1965-04-15	54	NO	moderate	5	4	improved	DIM	discharged	3	3	2020-03-29	24	0.37	0.01	0	0	1	0	0	1	.	nasal prongs	1	ok	110	60	84	fever, dyspnea	IRC, autoimmune vasculitis	Cardiovascular + other	antiviral+hydroxy+corticosteroids	2	1	antiviral+hydroxy+corticosteroids	1	1	23.89	30	101	99	482	0	249	2.82	681
29	2513	0	2020-04-03	1951-07-26	68	NO	moderate	5	6	worsened	DIM	discharged	8	7	2020-03-27	24	4.38	2.09	1	1	1	0	1	1	6	mask	1	tachypnea	100	60	110	fever, dyspnea, asthenia	asthma, hypertension, COPD	Cardiovascular + Respiratory	antiviral+hydroxy+corticosteroids	2	1	antiviral+hydroxy	1	1	25.58	27	64	95.2	141	2	112	1.27	353
35	2897	0	2020-04-07	1938-12-16	81	NO	moderate	5	4	improved	DIM	discharged	4	4	2020-04-03	22	1.65	1.97	1	1	0	0	0	0	1	mask	1	ok	115	60	78	fever, dyspnea	COPD, hypertensive cardiomyopathy	Cardiovascular + Respiratory	hydroxy+coriticosteroids	7	1	hydroxy+corticosteroids	1	3	14.88	42	114	98.9	396	0	63	0.71	601
31	2529	0	2020-04-03	1944-04-03	76	NO	moderate	5	5	worsened	DIM	discharged	3	3	2020-03-31	33	0.09	0.02	0	0	0	1	1	0	4	mask	1	mild tachypnea	110	60	68	transferred for fever and dyspnea	COPD, ictus	Cardiovascular + Respiratory	none	0	0	none	0	.	31.41	47	55	92.7	186	1	90	1.02	1723
7	2898	0	2020-04-07	1929-07-04	90	ACE-inhib	moderate	5	5	worsened	DIED	died	3	3	2020-04-04	22	8.74	1.84	1	1	0	0	0	0	2	mask	1	tachypnea	110	65	64	transferred for fever and dyspnea	COPD, hypertension, diabetes	Cardiovascular + Respiratory + diabetes	hydroxy+coriticosteroids	7	1	hydroxy	1	1	3.46	32	52	93.8	276	1	101	1.14	498
12	3017	1	2020-04-08	1930-12-31	89	ARBs	moderate	5	5	worsened	DIM RSA	discharged	2	2	2020-04-06	25	.	.	.	.	0	0	0	0	1	mask	1	tachypnea	150	80	86	transferred for fever	hypertensive cardiomyopathy, COPD, obesity, diabetes	Cardiovascular + Respiratory + diabetes + obesity	none	0	0	none	0	.	26.15	41	55	90.6	153	1	72	0.81	1100
19	2028	0	2020-03-26	1941-09-18	78	NO	moderate	5	4	worsened	DIM	discharged	4	4	2020-03-22	20	0.27	0.24	0	0	0	0	0	0	0	mask	1	tachypnea	150	80	103	fever and abdominal pain	COPD, hypertension, lung cancer, hypertensive cardiomyopathy, bladder cancer	Cardiovascular + Respiratory + other	antiviral+hydroxy+corticosteroids	2	1	antiviral+hydroxy	1	3	45.59	25	69	97.4	329	0	68	0.77	.
11	3440	0	2020-04-14	1946-01-26	74	ACE-inhib	moderate	5	5	improved	DIM	discharged	10	10	2020-04-04	31	0.38	0.05	0	0	0	1	0	0	.	nasal prongs	1	ok	140	70	70	fever, cought	hypertension, COPD, bladder cancer	Cardiovascular + Respiratory + other	hydroxy	6	0	hydroxy	1	3	24.32	37	72	96.1	257	1	82	0.93	1341
2	2186	0	2020-03-30	1935-11-06	84	ACE-inhib	moderate	5	5	worsened	DIED	died	2	2	2020-03-28	.	0.03	0.02	0	0	0	1	0	0	0	mask	1	ok	120	70	88	syncope, chest pain	diabetes	diabetes	none	0	0	none	0	.	1.67	21	85	89.9	225	1	175	1.98	6001
23	2051	0	2020-03-27	1953-03-05	67	NO	moderate	5	5	worsened	TRASF ICU	discharged	11	11	2020-03-16	24	5.88	0.77	1	0	1	0	0	0	9	mask	1	tachypnea	110	70	88	fever, cought	diabetes, dyslipidemia	diabetes + other	antiviral+hydroxy	1	0	antiviral+hydroxy	1	1	43.8	37	93	97.7	247	1	168	1.9	462
27	2398	1	2020-04-02	1926-08-17	93	NO	moderate	5	5	improved	DIM	discharged	3	3	2020-03-30	16	0.07	0.05	0	0	0	0	0	1	1	mask	1	tachypnea	130	85	86	transferred for dyspnea	FA	Neurological	none	0	0	none	0	.	38.25	35	61	94.4	295	1	50	0.57	242
24	2070	0	2020-03-27	1956-03-15	64	NO	moderate	4	4	worsened	DIM	discharged	5	5	2020-03-22	24	3.06	0.44	1	0	1	0	0	0	3	none	0	mild tachypnea	120	80	82	fever	FA	Neurological	antiviral+hydroxy+immunological+coritcosteroids	4	1	antiviral+hydroxy	1	1	32.31	39	73	97.3	343	0	86	0.97	274
43	3441	1	2020-04-14	1959-03-25	61	NO	moderate	5	5	improved	DIM	discharged	.	.	.	.	.	.	.	.	0	0	0	0	.	nasal prongs	1	ok	120	70	70	cardiac tamponade	hepatic cirrhosis, cardiac decompensation	other	hydroxy	6	0	hydroxy	1	3	101.2	37	62	94.6	194	1	50	0.57	4647
22	2048	1	2020-03-27	1946-03-03	74	NO	moderate	5	5	improved	DIM	discharged	7	7	2020-03-20	26	0.63	0.09	0	0	0	1	0	0	5	nasal prongs	1	ok	120	80	71	cough, asthenia	arrhythmia, hypothyroidism	Cardiovascular + other	antiviral+hydroxy	1	0	antiviral+hydroxy	1	1	28.97	32	52	96.3	276	1	67	0.76	200
32	2697	1	2020-04-06	1975-09-09	44	NO	moderate	5	4	improved	DIM	discharged	8	10	2020-03-27	25	18.12	2.08	1	1	1	0	0	0	8	mask	1	ok	105	65	74	syncope, low-grade fever, nausea	no	.	antiviral+hydroxy	1	0	antiviral+hydroxy	1	2	29.33	46	30	70.6	314	0	78	0.88	847
30	2514	1	2020-04-03	1945-11-14	74	NO	moderate	5	4	improved	DIM	discharged	11	11	2020-03-23	33	2.23	1.69	.	1	1	0	1	0	9	mask	1	tachypnea	120	70	70	fever, tachypnea	no	.	hydroxy	6	0	hydroxy	1	1	8.26	30	88	96.3	329	0	67	0.76	1427
34	2711	1	2020-04-06	1957-10-11	62	NO	moderate	5	5	improved	DIM	discharged	4	6	2020-03-31	27	0.32	3.91	0	1	1	0	0	0	4	nasal prongs	1	tachypnea	110	65	69	fever	no	.	hydroxy	6	0	hydroxy	1	1	52.02	40	88	98.6	232	1	61	0.69	976
39	3236	1	2020-04-10	1941-01-18	79	NO	moderate	5	5	improved	DIM	discharged	2	2	2020-04-08	33	6.1	3.58	1	1	0	0	0	1	0	nasal prongs	1	tachypnea	105	60	110	head trauma, fever, dyspnea	no	.	none	0	0	none	0	.	16.18	37	78	97.5	279	1	61	0.69	5237
45	3929	1	2020-04-20	1971-10-06	48	NO	moderate	4	4	improved	DIM	discharged	32	32	2020-03-19	32	3.5	1.82	1	1	0	1	0	1	30	none	0	tachypnea	110	75	110	chest pain	no	.	hydroxy	6	0	hydroxy	1	2	38.39	38	76	89.1	362	0	70	0.79	271
44	3568	1	2020-04-15	1945-01-25	75	NO	moderate	4	4	improved	DIM	discharged	1	1	2020-04-14	37	7.47	4.43	1	1	0	0	0	0	0	none	0	ok	150	90	75	abdominal pain	no	.	none	0	0	none	0	.	46.72	33	66	96	314	0	71	0.8	3319
21	2046	0	2020-03-27	1972-01-10	48	NO	moderate	5	4	worsened	DIM	discharged	7	7	2020-03-20	30	18.73	5.78	1	1	1	0	0	0	5	mask	1	tachypnea	110	70	80	fever, dyspnoea	no	.	antiviral+hydroxy+immunological	3	1	antiviral+hydroxy	1	1	26.8	32	91	98.8	329	0	68	0.77	1586
46	4036	0	2020-04-21	1999-07-07	20	NO	moderate	5	4	worsened	DIM	discharged	9	9	2020-04-12	18	.	.	.	.	1	1	1	1	7	nasal prongs	1	ok	130	80	100	fever, diarrhea, dyspnoea, cough	no	.	hydroxy+immunological	8	1	immunological+hydroxy	1	1	31.5	40	92	99.4	329	0	74	0.84	823
37	3016	0	2020-04-08	1946-01-12	74	NO	moderate	5	4	worsened	DIED	died	4	4	2020-04-04	26	.	.	.	.	1	1	0	1	2	nasal prongs	1	mild tachypnea	110	70	70	fever, cough	no	.	antiviral+hydroxy+immunological	3	1	none	0	.	27.31	35	79	97.9	329	0	87	0.98	440
[truncated: 17 more columns]

## Sheet: Legend
COLUMN TITLE	Description	Unit	Note
ACE_ID	ACE study ID
serumid	Serum ID
gender	Gender	0=M, 1=F
admission	Date of admission	DD/MM/YYYY
dob	Date of birth	DD/MM/YYYY
age	Age	years
severity_old	Severity - Old categories	Mild, Moderate, Severe
severitycat	category of severity	1=mild; 2=moderate; 3=severe
who_state	Pt state according to WHO classification	Moderate, Severe
who_score	Pt score according to WHO classification	4, 5, 6, 8
mod_pt_score_2	MODIFIED WHO score V.2	4, 5, 6, 8
clinicalcourse	clinical course	improved, worsened
clinicalcoursebin	clinical course binary	0=improved, 1=worsened
outcome	Outcome	Transf/DIM/DIED
outcomeb	outcome_b	Disharged; Died (Transfered pts classified as disharged)
outcomebin	outcome binary	0=discharged; 1=died
daysymptomsblood	days from symptoms to blood sample	n° of days
symptomsdate	date of symptoms appearance	DD/MM/YYYY
pcr_ct	Real time PCR Ct value	Ct
fever	fever	0=no; 1=yes
cough	cough	0=no; 1=yes
diarrhea	diarrhea	0=no; 1=yes
dyspnoea	dyspnoea	0=no; 1=yes
dayssymptomsdiagnosis	days from symptoms to diagnosis	n° of days
oxygen_supply	type of oxygen supply	none, mask, nasal prongs, venturi, niv, intubation
oxygen_cat	Category of oxygen supply	0=none; 1=low flow (mask, nasal prongs, venturi); 2=high flow (optiflow); 3=niv; 4=intubation
resprate	Respiratory rate	Breaths/minute
systolicbp	Systolic blood pressure	mmHg
dyastolicbp	Dyastolic blood pressure	mmHg
heartrate	Heart rate	beats/minute
reasonforadmission	reason for the hospital admission
comorbidity	co-morbidity	detail
comorbidity-category	comorbidity-category	Cardiovascular, Cardiovascular + other, Cardiovascular + diabetes, Cardiovascular + diabetes + obesity, Cardiovascular + diabetes + obesity + other, Cardiovascular + diabetes + other, Cardiovascular + Respiratory, Cardiovascular + Respiratory + other, Cardiovascular + Respiratory + diabetes, Cardiovascular + Respiratory + diabetes + obesity, diabetes , diabetes + other, Neurological, Other
treatment_received	treatment received	description
tt_category	Category of treatment received	0=none; 1=antiviral+hydroxy; 2=antiviral+hydroxy+corticosteroids; 3=antiviral+hydroxy+immunological; 4=antiviral+hydroxy+immunological+coritcosteroids; 5=corticosteroids; 6=hydroxy; 7=hydroxy+coriticosteroids; 8=hydroxy+immunological
modulatory_tt	Immunomodulatory treatment	0=no; 1=yes
type_tt_prior_blood	Type of treatment received before blood sampling for FC	detail
tt_prior_blood	Treatment received before blood sampling for FC	0=no; 1=yes
tt_prior_blood_duration	Treatment duration	number of days
pco2	pCO2	mmHg
po2	pO2	mmHg
so2	sO2	%
po2fi02	PO2/FiO2 (ratio)-indice di Horowitz	mmHg
po2fio2_cat	PO2/FiO2 categories	0: ≥ 300; 1: 150 - 299; 2: < 150
creatinine	Creatinine	micromol/L
creatininemgdl	Creatinine	mg/dL
ddimer	D-Dimer	ug/L
wbc	WBC	10^9/L
neutro	Neutrophil	10^9/L
neutroper	Neutrophil	%
lymphohct	Lymphocytes	10^9/L
lymphohctper	Lymphocytes	%
monohct	monocytes	10^9/L
monohctper	monocytes	%
crp	CRP	mg/L
ferritin	Ferritina	ug/L
il6_labanalysis	IL-6 measured by lab analysis	pg/ml
ACE_mU	ACE	mU
ACE2_mU	ACE2	mU
ang17_pg/ml	Ang 1-7	pg/ml
angII_pg/ml	AngII	pg/ml
ACE Inhibitor	ACE inhibitors	description
ACE Inhibitor_dic	ACE-inhibitors or ARBs	no=0; yes=1
CPK	Creatinfosfochinasi	U/L	34-145
VES	VES - Velocity of Erythrocyte Sedimentation	mm/H	M<34 F<38 up to 65 years M<37 F<45 above 65 years
LDH	Lactate dehydrogenase	U/L	140-250
doneg	date of negative pcr
daystoneg	days to negative pcr
igm	IgM anti-SARS-CoV2 spike protein (IgM-S)	index	sample relative light unit (RLU)/ calibrator RLU
igg	IgG anti-SARS-CoV2 nucleocapsid protein (IgG-N)	index	sample relative light unit (RLU)/ calibrator RLU
igm_pos	IgM-S positivity		0=negative; 1=positive
igg_pos	IgG-N positivity		0=negative; 1=positive
Comorbidities details:
AF	Atrial fibrillation
CMV	Cytomegalovirus
COPD	Chronic obstructive pulmonary disease
FA	Friedreich Ataxia
HCV	Hepatitis C
HTA	Arterial hypertension
IRC	Chronic Renal Insufficiency/Failure
OSAS	Obstructive Sleep Apnea Syndrome
STEMI	ST-segment elevation myocardial infarction
TIA	Transient ischemic attack
